# Supplementary material for: Toxicity of Cyanopeptides from Two Microcystis Strains on Larval Development of Astyanax altiparanae
Source: MDPI journal article supplement (doi:10.3390/toxins11040220), 2019-04-13
Supplement: s1 [file s1]

# Supplementary materials: Toxicity of Cyanopeptides from Two *Microcystis* Strains on Larval Development of *Astyanax altiparanae*

Kelly Fernandes, Andreia Gomes, Leonardo Calado, , George Yasui, Diego Assis, Theodore Henry, Ana Fonseca and Ernani Pinto

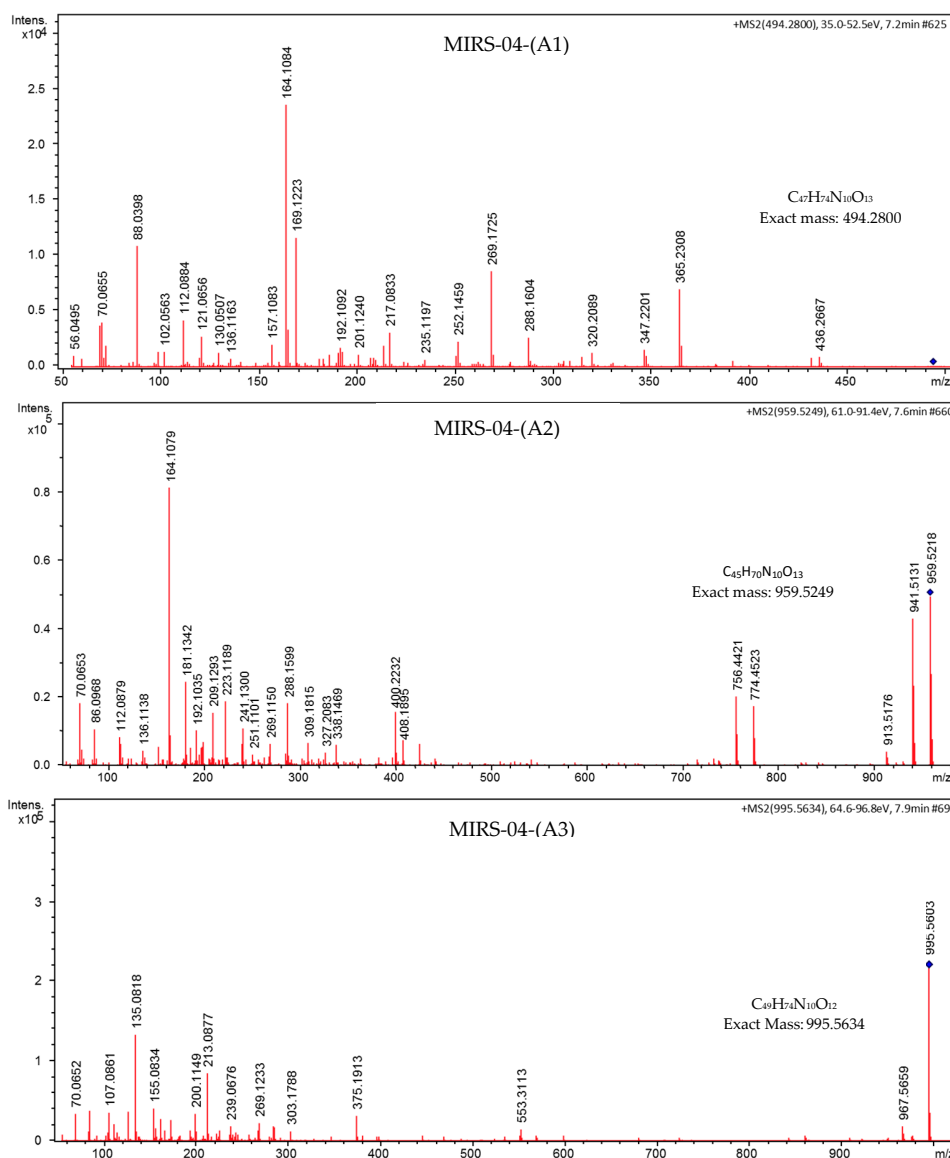

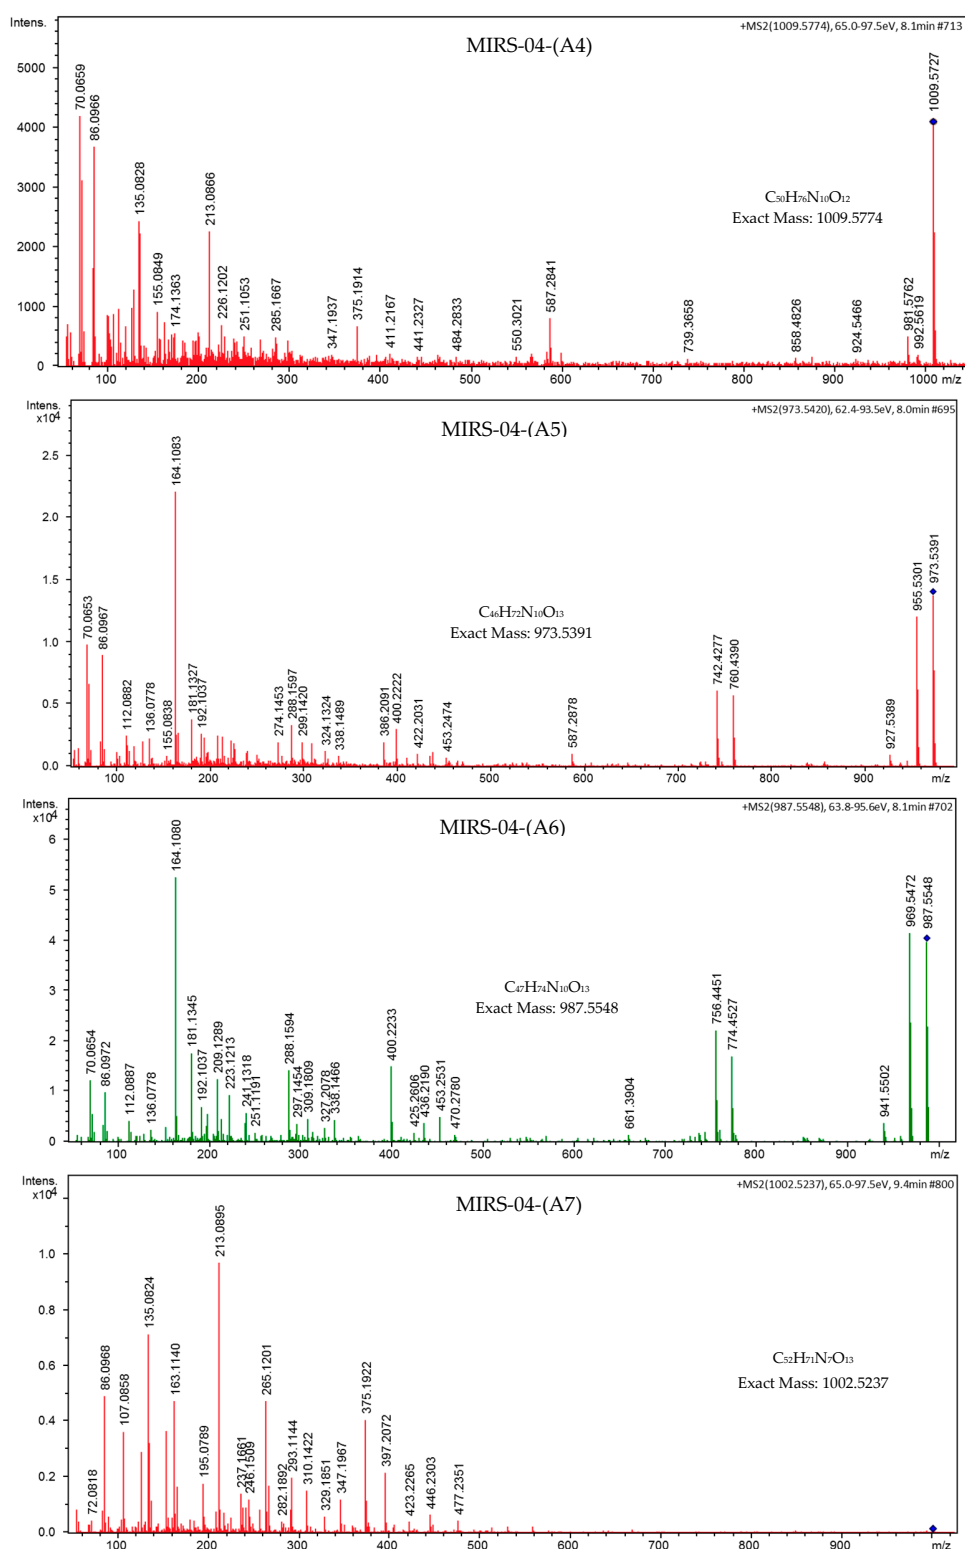

**Figure S1.** MS<sup>2</sup> spectra ions products of the compounds identified in strain MIRS-04 extract. The mass spectra follow the sequence of the peaks identified in the chromatogram for the extract of strain MIRS-04. The mass spectra are presented and quoted in Figure 1 in the text. Peak A1= [M+2H]<sup>2+</sup> *m/z* 494.2800 (micropeptin K139), Peak A2= [M+H]<sup>+</sup> *m/z* 959.5249 (micropeptin 959), Peak A3= [M+H]<sup>+</sup> *m/z* 995.5634,

Peak A4=  $[M+H]^+$   $m/z$  1009.5774 (microcystin HilR), Peak A5=  $[M+H]^+$   $m/z$  973.5391 (micropeptin 973),  
Peak A6 =  $[M+H]^+$   $m/z$  987.5548 (micropeptin B) and Peak A7=  $[M+H]^+$   $m/z$  1002.5237 (microcystin-LY).

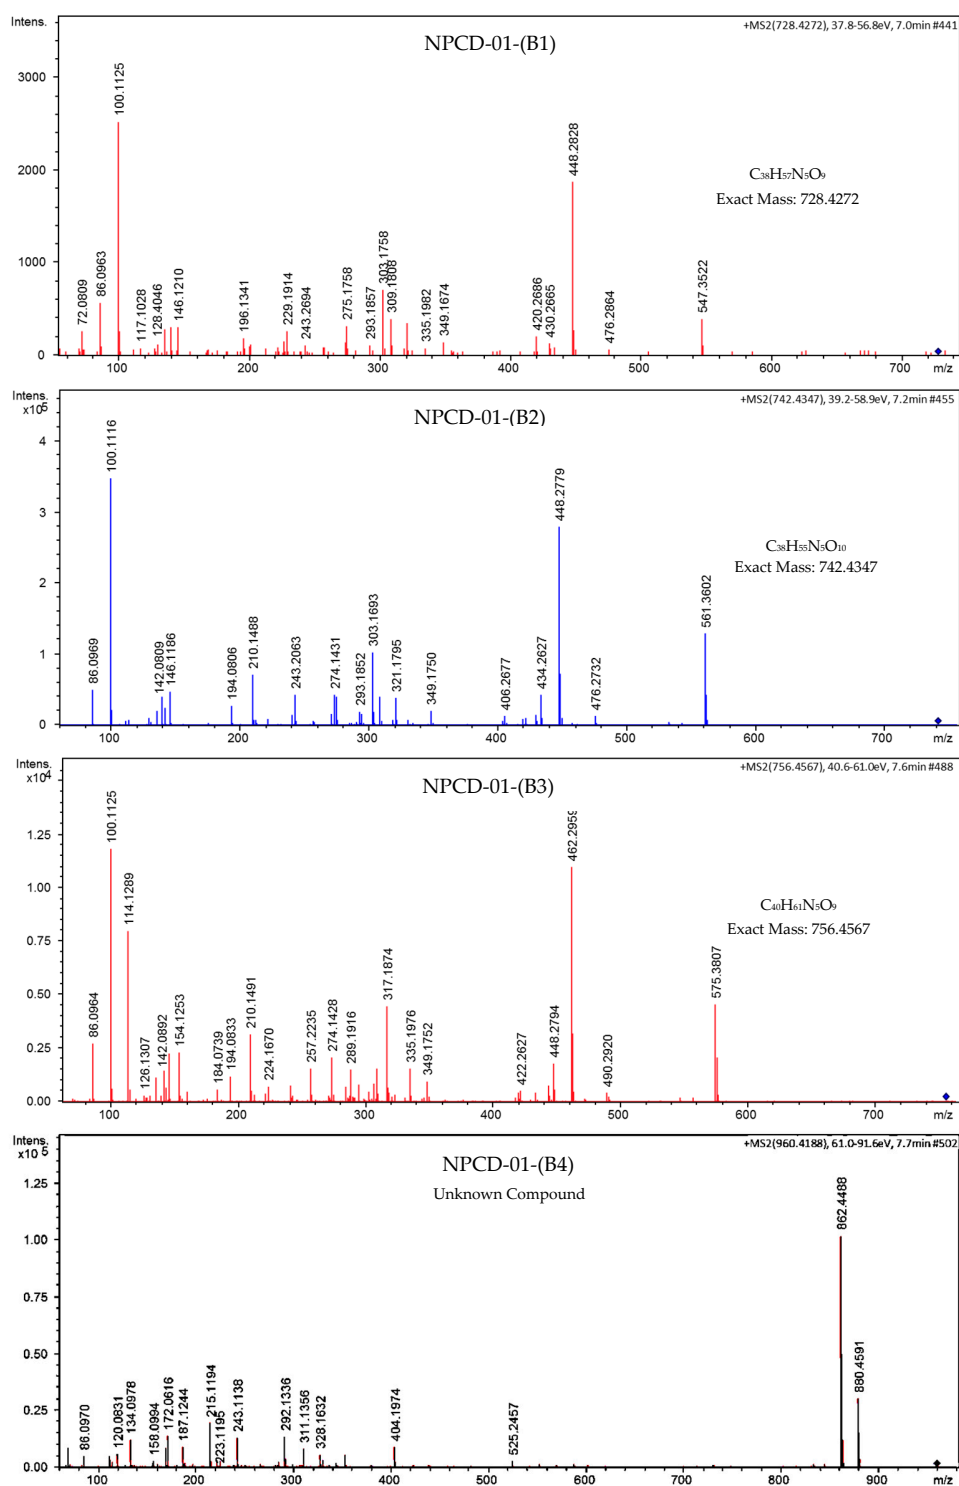

**Figure S2.** MS<sup>2</sup> spectra ions products of the compounds identified for the extract of strain NPCD-01. The mass spectra follow the sequence of the peaks identified in the chromatogram for the strain NPCD-01. The mass spectra are quoted as shown in Figure 1 in the text: Peak B1 = [M+H]<sup>+</sup> *m/z* 728.4272 (microginin FR1), Peak B2 = [M+H]<sup>+</sup> *m/z* 742.4347 (microginin FR2/FR4), Peak B3 = [M+H]<sup>+</sup> *m/z* 756.4567 (microginin SD 755) and Peak B4 = [M+H]<sup>+</sup> *m/z* 960.4188 unknown compound.

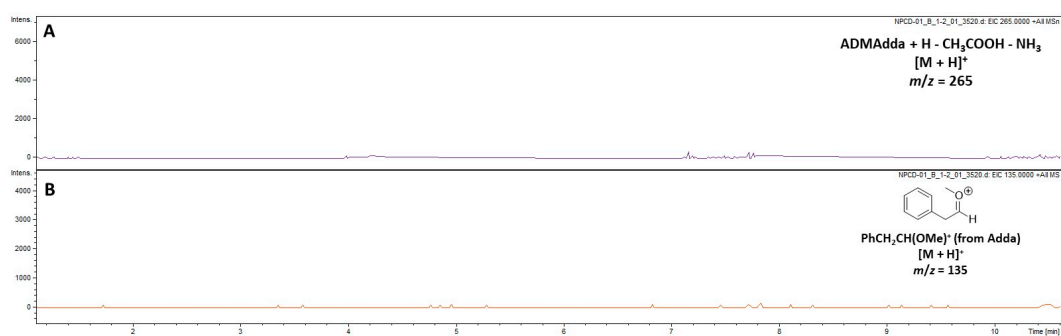

**Figure S3.** QTOF ESI+ Extracted ion chromatograms (EIC) of (A) ADMAdda + H - CH<sub>3</sub>COOH - NH<sub>3</sub> ( $m/z$  = 265) and (B) PhCH<sub>2</sub>CH(OMe)<sup>+</sup> ( $m/z$  = 135) (from Adda), confirming the absence of MCs in the water-soluble extract of NPCD-01 strain.
